**Evaluating the impacts of microbial activity and species interactions on passive  
bioremediation of a coastal acid sulfate soil (CASS) ecosystem**

3

4 Yu-Chen Ling<sup>1</sup>, John W. Moreau<sup>1,2\*</sup>

5

6 <sup>1</sup>School of Earth Sciences, The University of Melbourne, Parkville, VIC, Australia

7 3010

8

9 <sup>2</sup>School of Geographical and Earth Sciences, University of Glasgow, Glasgow, G12

10 8QQ, UK

11

12 Running title: *SRP activity in a CASS system*

13

14 \*Corresponding author: John W Moreau, [john.moreau@glasgow.ac.uk](mailto:john.moreau@glasgow.ac.uk)

15

16 Keywords: acid sulfate, microbial activity, sulfate-reducing, iron sulfides,

17 geomicrobiology, remediation

18

19 Submitted to *Soil Biology and Biochemistry* on 4<sup>th</sup> July, 2020

## Highlights

- Coastal acid sulfate soil (CASS) is a global environmental issue.
- Microbial activity can be modelled quantitatively to predict CASS remediation.
- Sulfate-reducing prokaryotes (SRP) play a key role in CASS remediation.
- Predation on SRP with cultured representatives occurred during early wet-up.
- The above mechanism leads to increased activity among uncultured SRP.

## Abstract

Microbial iron and sulfate reduction are the primary drivers of coastal acid sulfate soil (CASS) passive bioremediation schemes. Microbial sulfate reduction is the limiting step for pyrite formation, a desirable endpoint for CASS remediation. Little is known, however, about the impacts of microbial activity or species interaction on long-term iron and sulfur cycling in CASS ecosystems. Using a combination of molecular biology, geochemical speciation and artificial intelligence-powered computational modeling, we deduced from microbial activity patterns (RNA-based) and geochemical measurements a best-fit equation for predicting biogeochemical pyrite formation in a model CASS ecosystem. In addition to the time-dependent activities of key sulfate-reducing prokaryotic taxa (e.g. *Desulfobacteraceae*), this equation required methylotrophs (*Methylobacteriaceae*) and bacterial predators (*Bacteriovorax*) for best-fitting, suggesting that specific microbial interactions exert meaningful influences on CASS bioremediation efficiency. Our findings confirmed that CASS microorganisms act as an assemblage in response to rewetting by tidewater. Accurate predictions of long-term CASS bioremediation efficiency require

modelling of complex and interdependent relationships between geochemical speciation and microbial activity.

## Introduction

In some coastal regions, human activity has accelerated the oxidation of naturally formed iron-sulfide minerals, triggering soil acidification and remobilization of heavy metals (Minh et al., 1997; Moreau et al., 2013; Sundström and Åström, 2002; White et al., 2007). These coastal acid sulfate soil (CASS) systems present an environmental problem worldwide (Ljung et al., 2009). More than \$20 million CAD have been spent in the last century with an additional \$7 million CAD system built in Halifax International Airport to control the acidic runoff (Hicks, 2003). There are about 3,000 hectares of farmland in Malaysia reported as acid sulfate soil, and ground magnesium limestone treatment costs around \$1,130-3,820 USD per 10-hectare farm annually (Azman et al., 2014). The Australia Centre for International Agricultural Research spent around \$0.85 million AUD on investigating acid sulfate soil remediation in Indonesia (project no. FIS/1997/022) (Myler, 2010). Australia is facing a \$10 billion AUD “legacy” from acid sulfate soil (Fitzpatrick, 2003), even though Australian acid sulfate soil is only about 18% of the total 17 million hectare acid sulfate soils worldwide (Ljung et al., 2009).

Tidal inundation is one established strategy for remediating CASS (Powell and Martens, 2005), whereby flooding with seawater is used to neutralize acidity and induce (re)precipitation of metal-sulfides (Burton et al., 2007; Bush et al., 2004; Moreau et al., 2013). The driving force in this approach relies on the metabolic activity of anaerobic microorganisms that contribute up to 74% of the alkalinity in

lime-assisted tidal treatment systems (Johnston et al., 2012). Anaerobic microbial “guilds”, such as iron- and sulfate-reducing prokaryotes (IRP and SRP, respectively) commonly use organic substrate to metabolise and generate  $\text{Fe}^{2+}$  and  $\text{HS}^-$ . As  $\text{Fe}^{2+}$  and biogenic  $\text{HS}^-$  react, FeS forms as a poorly crystalline metastable phase (Meysman and Middelburg, 2005); conversion of this FeS to pyrite ( $\text{FeS}_2$ ) via  $\text{S}^0$  addition can then occur (Gagnon et al., 1995; Schoonen, 2004). The primary goal of CASS remediation is to neutralize acidity, and ultimately to re-precipitate iron sulfides (Burton et al., 2007; Bush et al., 2004), potentially as greigite or pyrite (Moreau et al., 2013), which are theoretically more stable phases (Billon, 2001).

The East Trinity wetlands (Cairns, Queensland, Australia) is a CASS system that experienced tidal inundation treatments since 2002 (Johnston et al., 2009b), which led to soil neutralization and heavy metal immobilization below the water table (Burton et al., 2011). In the East Trinity wetlands, microbial sulfate reduction only accounts for 7-13% of total alkalinity, compared to a 50-64% alkalinity increase from microbial iron reduction (Johnston et al., 2012). Previous studies have shown that biogenic  $\text{HS}^-$  is the limiting factor for pyrite formation in CASS ecosystems (Burton et al., 2011; Keene et al., 2010). Therefore, microbial sulfate reduction is the rate-determining step in CASS bioremediation.

In this study, we aimed to decrypt factors that influence microbial sulfate reduction in the East Trinity wetlands. SRP are not only the main driver of CASS bioremediation, but also play a vital role in the global carbon cycle. Furthermore, iron sulfide biominerals that precipitate as an indirect results of SRP activity can adsorb organic carbon and persist for years in anaerobic conditions (Picard et al., 2019). In our

previous study, we found that environmental organic substrates are generally not a limiting factor for microbial sulfate reduction (Ling et al., 2015). However, microbial activity and species relative abundance have been shown to vary significantly in response to rewetting by tidewater (Ling et al., 2018). Therefore, we hypothesize that other microbial populations may impact SRP metabolic efficiency during different dry-down and wet-up (i.e. tidal) stages.

Previous studies have applied artificial intelligence methods to predicting: microbial diversity in soils (Park et al., 2011), net primary productivity in oceans (D'Alelio et al., 2020), cyanobacteria blooms in a freshwater lake (Tromas et al., 2017), nitrification processes in a sludge plant (Awolusi et al., 2016), and bioreactor performance in treating wastewater (Lesnik and Liu, 2017). Here, we test the significance of co-occurring environmental parameters and microbial network patterns in the East Trinity CASS system, and apply artificial intelligence modelling to predict the effects on pyrite formation. Similar to previous studies that focused on grassland microbial responses to rainfall or freshwater wetting leading to a peak in CO<sub>2</sub> generation (Aanderud et al., 2015; Navarro-García et al., 2012; Placella et al., 2012), our study provides new data from a different type of environmental rewetting event (CASS tidal inundation) and coupled biogeochemical process (iron sulfide mineralization).

## **2. Materials and methods**

### *2.1 Field site and soil sampling*

The East Trinity wetland (145°80'E, 16°94'S) is located in a tropical estuary covered by mangrove trees and samphire (Hicks et al., 1999), across Chinaman Creek from

Cairns, Queensland, Australia. The wetland was drained for sugarcane agriculture in the 1970's, leading to severe soil acidification from enhanced oxidation of geogenic sulfide minerals (Powell and Martens, 2005). The practice of managed tidal inundation treatment was introduced in 2002 (Johnston et al., 2009b), and soil neutralization and heavy metals immobilization have since been reported for the soil layers below the water table (Burton et al., 2011).

Soil sampling and data preparation were performed using previously published methods (Ling et al., 2018). The sampling site consists of a 100-meter transect through the supra- to sub-tidal zones of East Trinity (Burton et al., 2011; Johnston et al., 2010; Ling et al., 2015). Duplicate sediment cores were collected in September 2013 across three sites (A: supra-, B: inter-, and C: sub-tidal zone, Fig. 1D) and four tidal stages (low tide: dry-down stage, flood tide: early wet-up stage, high tide: middle wet-up stage, ebb tide: late wet-up stage). These cores were then sectioned into seven intervals (1: 0-2 cm, 2: 2-4 cm, 3: 4-6 cm, 4: 6-8 cm, 5: 8-10 cm, 6: 12-14 cm, 7: 18-20 cm, Fig. 1D). One core from each duplicate set was used to assess microbial diversity and activity, and to quantitatively analyse environmental Fe and S speciation (Supplementary Table 1); the other core was used to evaluate reproducibility in molecular biology analyses. One biofilm sample was collected during the high tide stage from the surface water.

In total, six different datasets were evaluated (Supplementary Table 1): microbial activity (based on RNA sequences), microbial distribution (based on DNA sequences), sulfate-reducing functionality (based on *dsrA* and *dsrB* genes from DNA and cDNA sequences), DNA and RNA dissimilarity (based on DNA and RNA sequences from

one biofilm sample), protocol reproducibility (based on DNA sequences), and soil geochemistry (based on iron and sulfur speciation).

For checking the validity of sampling and bioinformatic protocols, duplicate soil subsamples from three sites, four tidal stages, and depths 2, 4, and 6, were selected to test for reproducibility (Supplementary Table 1). To prepare the datasets used for the evaluation of protocols, we extracted DNA from a total of 72 subsamples for 16S rRNA gene sequencing, and then analyzed the similarity of microbial taxonomic structures of these samples. If the sampling and bioinformatic protocols were reproducible, samples from the duplicate soil subsamples should share the highest similarity.

We selected triplicate soil subsamples from three sites, four tidal stages, and seven depths for microbial diversity and activity evaluation (Supplementary Table 1). The triplicate soil subsamples were homogenized before DNA and RNA extraction. RNA from a total of 84 samples were isolated to access microbial activity. For microbial populations, we homogenized subsamples across four tidal stages to get a total of 21 samples for DNA extractions. Because the amounts of samples were limited, DNA and cDNA (synthesized from RNA) samples from seven depths were homogenized for functional gene (*dsr*) sequencing, which contained 12 cDNA samples from three sites and four times, and DNA samples from three sites. Since soil DNA and RNA were not extracted from the same samples, we also extracted another DNA and RNA from a biofilm sample to evaluate the dissimilarity of microbial taxonomic structures between DNA and RNA sequences.

For DNA and RNA extractions, triplicate subsamples were collected from each core interval and preserved in 15 mL conical tubes with 2 mL of LifeGuard Soil Preservation Solution (MoBio Laboratory Inc., Carlsbad, CA, USA). The remaining soil samples from each interval were preserved in Petri dishes, and duplicate subsamples were selected afterward for geochemical speciation. All samples and subsamples were stored at -80 °C for subsequent analyses.

## *2.2 DNA and RNA extraction, 16S rRNA and dsr amplification*

Total DNA and RNA from ~1 g of soil were extracted following the PowerSoil DNA Isolation Kit protocol (MoBio Laboratory Inc.) and RNA PowerSoil Total RNA Isolation Kit protocol (MoBio Laboratory Inc.), respectively. Since our samples contained elevated organic C and salinity, we followed a troubleshooting protocol to use 1 g of soil, and incubated samples at ~20°C in the nucleic acid precipitation step. DNA contamination in RNA samples was removed using the Ambion DNA-free kit (Ambion, Austin, TX, USA) or TURBO DNA-free kit (Ambion).

After RNA purification, cDNA was synthesized following the SuperScript™ II Reverse Transcriptase (Invitrogen) protocol with random primers (Invitrogen) and the RNaseOUT™ (Invitrogen) reagent. We performed PCR (polymerase chain reaction) with three different primer sets to ensure there was (1) no detectable DNA amplification in the RNA samples, and (2) the DNA extraction and (3) cDNA synthesis were successful. The PCR using the following primers: 27F (5'-AGR GTT TGA TYM TGG CTC AG-3')/518R (5'-ATT ACC GCG GCT GCT GG-3'), 926F (5'-AAA CTC AAA KGA ATT GAC GG-3')/1392R (5'-ACG GGG GGT GWG TRC-3') and U341F (5'-CCT ACG GGN GGC WGC AG-3')/805R (5'- GAC TAC HVG GGT

ATC TAA TCC-3') (Klindworth et al., 2013). Dissimilatory sulfite reductase genes *dsrA* and *dsrB* were amplified from DNA and cDNA samples, with DSR1F+ (5'-ACSC ACT GGA AGC ACG GCG G-3')/DSR-R (5'- GTG GMR CCG TGC AKR TTG G-3') and DSRp2060F (5'- CAA CAT CGT YCA YAC CCA GGG -3')/DSR4R (5'-GTG TAG CAG TTA CCG CA -3') primer sets, respectively (Geets et al., 2006; Kondo et al., 2004; Perez-Jimenez et al., 2001).

Genomic DNA, genomic cDNA, *dsrA*, and *dsrB* samples were sent to Monash University Malaysia Genomic Facility for Illumina MiSeq sequencing (250-base pair, bp, 50 paired-end reads), with primer sets U341F/805 for genomic DNA and cDNA samples, DSR1F+/DSR-R for *dsrA* samples, and DSRp2060F/DSR4R for *dsrB* samples. Raw data were deposited in the Sequence Read Archive (SRA) of NCBI (PRJNA291811).

### 2.3 Bioinformatic analysis

We followed the MiSeq pipeline released by the MOTHUR authors (Kozich et al., 2013) to combine the forward and reverse sequences, trim low-quality bases and sequences with unexpected lengths, select unique sequences, cluster the unique sequences, detect chimera using UCHIME (Edgar et al., 2011), remove chimera, and classify the 16S and *dsr* sequences. Also, we used a phylotype-based approach for 16S OTU classification (Schloss and Westcott, 2011). After passing quality controls, sequences were aligned with the RDP database for classification. The 16S phylogenetic operational taxonomic units (OTUs) were defined based on taxonomic classification assigned by reference to the Ribosomal Database Project (RDP) (Cole et al., 2013) with an 80% confidence threshold and up to five mismatches using a naïve

Bayesian classifier (Wang et al., 2007) (MOTHUR's "classify.seqs" and "phylotype" commands).

Operational taxonomic identities were assigned to *dsr* sequences by reference to the published *dsrAB* databases (Müller et al., 2015), respectively, using a naïve Bayesian classifier (Wang et al., 2007) in MOTHUR. The *dsr* operational taxonomic units (OTUs) were defined by a distance of 0.1 (Müller et al., 2015). The most abundant sequence in each *dsrA* and *dsrB* OTU was selected as the representative sequence for building phylogenetic trees; 16S OTUs in cDNA and DNA datasets that shared the same family or genus names as *dsrA* and *dsrB* OTUs were selected, and the most abundant sequence in each OTU was selected for building the phylogenetic tree. All the steps were processed using MOTHUR.

#### *2.4 Environmental parameter measurement*

Soil moisture was measured by weighing mass loss in ~5g soil after 24 hours of drying in an oven at 105°C. Measured values were used to normalise Fe and S speciation to per gram of dry soil.

Reduced inorganic sulfur species, including acid volatile sulfide (AVS), elemental sulfur (ES), and chromium-reducible sulfur (CRS), were extracted and measured sequentially following well-established protocols (Burton et al., 2011; 2009; 2008). AVS is defined as sulfur in iron monosulfide, ES is defined as elemental sulfur, and CRS is defined as sulfur in pyrite. AVS values can be converted to iron in iron monosulfide (FeS-Fe) using a 1:1 ratio, and CRS values can be converted to iron in pyrite (FeS<sub>2</sub>-Fe) using a 2:1 ratio (Table 2).

245

246 AVS was extracted using 6 M HCl and two mL 1 M L-ascorbic acid, and captured  
247 using a NaOH-buffered zinc acetate solution, and then quantified by iodometric  
248 titration. ES was extracted from the AVS-extracted samples using toluene, and  
249 analyzed using high-performance liquid chromatography (HPLC) using a Dionex  
250 UltiMate 3000 system. CRS was extracted from the ES-extracted samples using  
251 acetone and ethanol, captured using a NaOH-buffered zinc acetate solution, and was  
252 quantified by iodometric titration.

253

254 Fe species included soluble Fe salts ( $\text{MgCl}_2\text{-Fe}$ ), crystalline Fe (CDB-Fe), and poorly  
255 crystalline Fe (the HCl-Fe minus FeS-Fe, Table 2); HCl-Fe, and CDB-Fe, were  
256 extracted and measured sequentially following established protocols (Claff et al.,  
257 2010), and  $\text{MgCl}_2\text{-Fe}$  was extracted using 1 M  $\text{MgCl}_2$ . The remaining samples were  
258 used to extract HCl-Fe using 1 M HCl; the amounts of extracted Fe(II) and total Fe  
259 were determined using spectrophotometry by the ferrozine method (Viollier et al.,  
260 2000). DCB-Fe was extracted from the residual samples using the dithionite-citrate  
261 buffer (DCB), and determined using inductively coupled plasma mass spectrometry  
262 (ICP-MS).

263

264 Soils were dried at 60°C for 48 hrs before crushing and analyzing for total Fe and S  
265 measurements at the Environmental Analysis Laboratory (EAL) of Southern Cross  
266 University (SCU). Total Fe was analyzed using inductively coupled plasma-mass  
267 spectrometry (ICP-MS) using a 1:3  $\text{HNO}_3/\text{HCl}$  digestion method, and total S was  
268 quantified using a LECO TruMAC CNS Analyser.

269

## 2.5 Data processing

We compared measured soil properties to results from previous studies of the same locations in East Trinity. Pyrite and poorly crystalline Fe fractions (defined as the ratios of pyrite-S : total S and poorly crystalline Fe : total Fe) in actual CASS, inundation-treated CASS, and undrained mangrove wetland from a previous study at the same site (Johnston et al., 2009c; Keene et al., 2010) were evaluated.

The degree of pyritization (DOP) and degree of sulfidization (DOS) provided indices to characterise depositional environments: DOS measures the extent of reactive iron transformed into iron sulfide minerals (Boesen and Postma, 1988), while DOP represents reactive iron transformed to pyrite (Berner, 1970). In this study, we calculated the difference between DOS and DOP to deduce the extent of reactive iron transformation to iron monosulfide, but which was not yet converted to pyrite. DOS and DOP were calculated as follows (Berner, 1970; Boesen and Postma, 1988):

$$\text{DOS} = ([\text{FeS-Fe}] + [\text{FeS}_2\text{-Fe}]) / ([\text{FeS}_2\text{-Fe}] + [\text{HCl-Fe}]) \quad (\text{Eq. 1})$$

$$\text{DOP} = ([\text{FeS}_2\text{-Fe}]) / ([\text{FeS}_2\text{-Fe}] + [\text{HCl-Fe}]) \quad (\text{Eq. 2})$$

where FeS is iron monosulfide, and FeS<sub>2</sub> is pyrite.

Sequences were rarefied before calculating similarities among samples using the "dist.shared" and "sub.sample" commands in MOTHUR. The "dist.shared" command generated a distance matrix for dissimilarity analyses. The "sub.sample" command normalized samples to the same size by selecting sequences randomly prior distance calculating. Sample normalization and distance calculation were repeated for 1,000

times and generated an average result of distance matrix for subsequent dissimilarity analyses using MOTHUR. The taxonomic similarity between cDNA and DNA (16S rRNA gene based) in soil and biofilm samples was calculated using the Jaccard index (Jaccard, 1908) and visualized by non-metric multidimensional scaling (NMDS) using MOTHUR software. The test statistic and associated significance value (ANOSIM) (Clarke, 1993) of these four datasets were calculated using MOTHUR.

To evaluate whether pyrite and poorly crystalline Fe ratios drove observed differences in cDNA taxonomic-based microbial community structures, we first calculated taxonomic dissimilarity between 16S OTUs in cDNA rarefied samples using the Bray-Curtis index, then we tested these environmental factors for correlation, with significant correlations ( $p < 0.05$ ) shown as vectors on the non-metric multidimensional scaling (NMDS) using the *R* package *vegan*.

We used the artificial intelligence package Eureka (Schmidt and Lipson, 2013; 2009) to find a best-fit equation for predicting soil pyrite ratios from microbial cDNA (16S based) contents (i.e., to construct a “pyrite predicting equation”). Eureka first creates random equations based on the provided dataset, then evaluates the fitness of every equation. These preliminary best-fit equations are selected and are used to generate a new round of searching. In the new round of searching, new equations are formed by varying the previous equations and retaining the equations that better fit the dataset. The 84 soil samples were ranked based on pyrite-S fractions, and then divided into two sets (Fig. S4A). One set was used to train Eureka to find the best-fit equation, and the other set was used to validate results (Fig. S4A). Taxa present in less than 25% of the samples were removed from both the training and validation sets. The

accumulated relative abundances of selected OTUs from each sample were calculated to evaluate that filtering criterion.

To assess potential environmental and microbial parameters controlling SRP activity, geochemical data (e.g., concentrations of pyrite, iron monosulfide, or organic carbon) and variations in cDNA levels of selected taxa and metabolic guilds (SRP, *Bdellovibrionales*, *Acidobacteria GP 3*, and *Gammaproteobacteria*) in different dry-down and wet-up stages were quantitatively compared.

To evaluate the response of microbial interactions to rewetting by tidewater, all 84 cDNA samples were divided into four groups based on collection timepoints. Each group contained 21 subsamples across depths and tidal zones used to perform microbial network analysis, in order to investigate microbial interaction patterns across the study site at specific dry-down and wet-up stages. OTUs present in less than 50% of samples from each tidal stage were removed from the cDNA datasets. Microbial interaction networks were inferred using CoNet (Faust et al., 2012) and visualized using Cytoscape (Shannon et al., 2003). Correlation between microbial cDNA abundances were measured using the Pearson and Spearman correlations, Bray–Curtis distance and Kullback–Leibler divergence measurement, then the best predictions were selected. A well-established approach was used for multiple-testing correction (Benjamini and Hochberg, 1995), and p-values were merged using the method of Brown (Brown, 1975). Only the relationships that displayed significant correlations ( $p < 0.05$ ) were visualized as networks. Microbial networks were reconstructed, containing OTUs that were present in more than 50% of samples across all four tidal stages, and displayed significant correlations with each other. In these

networks, each node represents one OTU, while connections between two nodes represent an interrelationship between two OTUs. Due to the complexity of node relationships, sub-networks were constructed to focus on potential predator-prey relationships. Only the first and second neighbors of potential predators were kept in these sub-networks.

## 2.6 Plotting and data processing software

The software R (Team, 2013) with packages gplots (Warnes et al., 2009), MASS (Venables and Ripley, 2002), vegan (Oksanen et al., 2015), and plyr (Wickham, 2011) were used for statistical analysis and data visualisation. We also used the AI software package Eureka to analyse datasets for network correlations. The software packages TreeGraph 2 (Stöver and Müller, 2010), Cytoscape (Shannon et al., 2003) with application CoNet (Faust and Raes, 2016), iWork Keynote and Office Excel were also used to visualise data and generate plots.

## 3. Results

### 3.1 Replication evaluation and overall microbial taxonomic structures

Our previous work showed that samples from the same soil depth interval displayed the highest similarity of microbial DNA taxonomy-based microbial community structure, confirming our sampling reproducibility (Ling et al., 2018). We identified 1170 OTUs from a total 107 16S sequencing samples for microbial distribution and activity, DNA and RNA dissimilarity evaluations. A significant separation between soil DNA and soil RNA taxonomic structure (16S based) was detected by ordination NMDS (Fig. S1A); ANOSIM analysis displayed an  $R$ -value of 0.45,  $p < 0.001$  (Fig. S1B). The  $R$  values are between 1 and -1, in which positive numbers suggest that

there are more similarities within groups than between groups; negative numbers indicate vice versa.

### 3.2 Geochemical characteristics

The chemical profiles of iron sulfide minerals show that site C (subtidal zone) contains the highest amount of iron monosulfide and pyrite among the three sampling sites, and of iron monosulfide accumulated in the flood and ebb tides (Fig. S2). By comparing the poorly crystalline Fe and pyrite-S contents to values from a previous study (Fig. 1A), we could semi-quantitatively assess the degree of bioremediation progress achieved to date in the East Trinity wetland site. None of our samples contained the pyrite-S : total S ratios representative of “undisturbed” mangrove soils (Fig. 1B). Instead, our soil samples displayed variable levels of poorly crystalline Fe and pyrite-S. Generally, samples that contained lower pyrite and poorly crystalline Fe levels originated mostly from the organic-enriched zone (Figs. 1C and 1D), whereas samples that contained higher pyrite-S : total S ratios were collected during ebb tide conditions (Fig. 1C). DOS values were higher than the DOP values in all of our samples (Fig. 1E), suggesting that Fe was present in the more reactive iron monosulfide phase instead as pyrite. Variations of cDNA taxonomic structure were correlated with soil pyrite and poorly crystalline Fe ratios (Fig. 1F).

### 3.3 Prediction of soil pyrite ratios

We selected 326 and disregarded 686 OTUs (from a 16S cDNA-constructed database) for predicting soil pyrite ratios, the selected OTUs constituted more than 98% of relative abundances (Fig. S3). The best-fit pyrite equation, based on 72 samples in the training set, displayed a Pearson coefficient of  $r = 0.92$  with  $p < 2.2e-16$  (Fig.

S4B). This equation predicted soil pyrite ratios well for the validation dataset ( $r =$   
0.88 with  $p < 0.001$ , Fig. S4C). The equation contained two archaeal taxa  
(*Euryarchaeota*), 11 bacterial taxa (*Acidobacteria*, *Actinobacteria*, and  
*Proteobacteria* classes *Alpha*-, *Delta*-, and *Gamma-proteobacteria*) (Table 1).  
Among the selected taxa, we identified taxa 1730 and 1739 as SRP, taxon0694 as a  
methylophile (Kuever, 2014), and taxon1713 as a bacterial predator (Table 1). We  
also observed taxa that could be assigned to early and delayed responders identified  
from different wet-up stages in our previous study (Ling et al., 2018). *Acidobacteria*  
*GP 3* displayed a higher cDNA contents during flood and high tides (taxon0089, Fig.  
S4D), and taxa within the *Gammaproteobacteria* had the highest cDNA contents  
during the ebb tide (e.g. taxon0160, Fig. S4F).

### 3.4 Microbial activities and chemical variations during different tidal stages

Seven SRP were classified at the family or genus level from *dsrA* and *dsrB* sequence  
datasets, with six of these also identified in the 16S dataset (Fig. S5). One SRP taxon  
found with 16S, but not *dsrA* or *dsrB*, sequences was of order *Desulfuromonadales*.  
In the following analysis, classified SRP were referred to as *dsrA* and *dsrB* targeted  
OTUs (Fig. S5) and *Desulfuromonadales*. Ten of the SRP taxa identified using *dsrA*  
and *dsrB* genes are presently uncultured (Fig. S5). The number of uncultured SRP  
able to be identified was higher when using *dsrB*, as compared to *dsrA*, genes (Fig.  
S5). Thus we represented cDNA variability of uncultured SRP across tidal stages  
using reverse-transcribed *dsrB* cDNA sequences (Fig. 2E). These uncultured SRP  
displayed increased *dsrB* cDNA during the middle and late wet-up stages (high and  
ebb tides), in contrast to *dsrB* cDNA from flood and high/ebb tides ( $t$ -test,  $P < 0.05$ ,  
Fig. 2E). In contrast, SRP OTUs most closely related to cultured representatives

increased in cDNA during the early and middle wet-up stages (flood and high tides), and decreased during the late wet-up stage (ebb tide). Average cDNA values during ebb tide showed significant differences from the other three tidal stages (*t-test*,  $P < 0.05$ , Fig. 2D).

To interpret changes in cDNA levels for all SRP taxa, we co-analyzed (1) changes in environmental parameters, and (2) microbial predator abundance over different dry-down and wet-up tidal stages. Pyrite and iron monosulfide accumulated at flood and ebb tides (Figs. 2A and 2B), and organic carbon content was highest at ebb tide (Fig. 2C). Five predator genera were identified within order *Bdellovibrionales*, including *Bacteriovoracaceae* and *Bdellovibrionaceae* families (Table 2), two well-known predatory microorganisms (Pineiro et al., 2007). The cDNA levels of microbial predators displayed similar patterns to known SRP, with increasing cDNA levels during flood and high tides, and decreasing cDNA at ebb tide (Fig. 2F). The cDNA levels of known SRP and predators were proportional only at flood tide (Figs. 3A-D).

The numbers of predators' first neighbors in microbial networks were 1, 16, and 9, at low and ebb tides, flood tide, and high tide, respectively (Fig. 4). Among these first neighbors, 2 and 1 known SRP taxa negatively correlated with predator taxa during the flood and high tides, respectively. OTU 1034 was first neighbor to predators taxa *Bacteriovoracaceae* and *Bdellovibrionaceae* at both ebb and high tides, and is most closely related to genus *Thiopfundum*, known to fix CO<sub>2</sub> and oxidize sulfur (Mori et al., 2011; Watts et al., 2017). OTU 809, most closely related to genus *Burkholderia* (Estrada-de los Santos et al., 2001), capable of fixing nitrogen, was first neighbor to predator taxa at low tide.

445

446 In microbial network analyses, OTUs needed to be present in more than 50% of  
 447 samples from each tidal stage, and to display a significant correlation to other OTUs,  
 448 in order to be visualized as networks. OTUs that were present in more than 50% of  
 449 samples from each tidal stage were: 244, 153, 174, 243, at low, flood, high, and ebb  
 450 tides, respectively. The relationships between OTUs with  $p$ -values above the  
 451 threshold (0.05) were then removed. In the end, the total number of nodes (OTUs)  
 452 were 200, 138, 163, and 178 at low, flood, high, and ebb tides, respectively (Fig. 4).  
 453 There were 1231, 638, 912, and 659 connections among nodes for low, flood, high,  
 454 and ebb tide networks, respectively. Predators' first and second neighbor  
 455 relationships during flood and high tides outnumbered those of other tidal stages (Fig.  
 456 4). The numbers of predators' first and second neighbors in microbial networks were  
 457 24 at low tide, 67 at flood tide, 75 at high tide, and 7 at ebb tide. Known SRP were  
 458 among the first and second neighbors to predator taxa across all four tidal stages.

459

## 460 Discussion

461 Soil microorganisms can contain a higher abundance of inactive microbes than other  
 462 environments, such as freshwater, activated sludge, and the human gut (Lennon and  
 463 Jones, 2011). These inactive microorganisms have low metabolic rates when  
 464 environmental conditions become unfavourable, and decoupling occurs between  
 465 active and total microbial populations (Jones and Lennon, 2010). A previous study  
 466 observed significant separation between standing (DNA-based) and active (RNA-  
 467 based) communities in soil systems (DeAngelis et al., 2010), which was also found in  
 468 our study site (Fig. S1). To observe relationships between environmental and  
 469 microbial dynamics in a more rapid period of land transition, researchers have

suggested using RNA-based community structure rather than DNA (Meyer et al., 2019). Tidal inundation treatment imposes rapid environmental changes on coastal microorganisms, and therefore we used cDNA (RNA-based) communities to link with soil mineralization for this study.

Because rRNA (cDNA) content may not always be directly proportional to growth rate, and some microorganisms can contain more rRNA in dormancy (Blazewicz et al., 2013), we used the variation in cDNA relative abundances as an indicator of microbial activity. Since growth is only part of cellular activity (Hoehler, 2004), the cDNA variability to which we refer represents overall activity and not solely growth. Variation in cDNA content can be viewed as a change of total activity (Ling et al., 2018), because RNA synthesis costs energy (Wagner, 2005); thus we treat increasing cDNA levels as increasing activity, and vice versa. The following analyses of microbial activity (Figs. 2D-F, 3) relied on changing cDNA contents across different dry-down and wet-up tidal stages, and the constructed pyrite-prediction equation was based on cDNA variations across 84 samples (Figs. S4A-C). The microbial interaction networks (Fig. 4) were built by comparing the cDNA variability of OTUs during each dry-down or wet-up stage.

#### *4.1 Passive bioremediation progress in the East Trinity wetland*

A previous study compared the compositions of soil iron and sulfide compounds in soils from three different bioremediation stages: mangrove soils (represented as undisturbed soils), actual acid sulfate soils, and tidally inundated CASS soils (Keene et al., 2010). The mangrove soils contained high amounts of pyrite (Fig. 1A) that was oxidized during drainage to form Fe(III) minerals; reductive dissolution of Fe(III)

minerals during tidal inundation leads to accumulation of poorly crystalline Fe and re-precipitation of pyrite (Fig. 1A). The soil samples in this study contained different degrees of soil pyrite and poorly crystalline Fe ratios providing a range of mineral phase and potential transformations. A small number of samples displayed low pyrite and poorly crystalline Fe ratios (Figs. 1B and 1C), characteristic of actual acid sulfate soils. These samples were located in the high organic carbon zone (Figs. 1C and 1D), where soil pH was below 5.5 (Ling et al., 2018; 2015), conditions which are consistent with the formation of CASS. Soils in the supra-tidal zone were exposed to air for a longer time than those in inter- and sub-tidal zones, causing pyrite oxidation and release of acidity. Samples containing the highest pyrite ratios and lowest poorly crystalline Fe ratios were collected during the flood and ebb tide periods (Fig. 1B), confirming that tidal inundation provides the primary CASS remediation mechanism. Previous studies reported that soil pH in the East Trinity wetland increased from ~3 to ~6 after five years of tidal inundation treatment (Hicks et al., 1999; Johnston et al., 2009a).

Soil pyrite and poorly crystalline Fe ratios in our samples also suggested that remediation is ongoing, and has not yet resulted in pyrite contents as high as those associated with undisturbed mangrove soils. Relatively high DOS and low DOP values in our samples (Fig. 1E) suggested that iron monosulfides, instead of pyrite, comprised the bulk of iron sulfide mineral phases in our system. Many samples contained abundant reactive iron (Fig. 1B), favoring iron monosulfide accumulation and limiting the transformation of AVS and ES to pyrite (Keene et al., 2010). This observation is consistent with results from a previous study of the same site, in which sulfide concentrations were below detection limits (Burton et al., 2011). Compared to

pyrite that is more stable during tidal inundation stages, soils contained higher amounts of iron monosulfide during the flood and ebb tides, (Fig. S2). This finding supports the previous study which stated that pyrite is considered to be a stable compound (Billon, 2001). Iron monosulfide, however, could form black ooze with organic matter and cause rapid de-oxygenation when mixed with water (Bush et al., 2004).

#### 4.2 Microbial activities controls pyrite formation

The taxonomic structure of active microbial populations correlated with soil pyrite and iron ratios (Fig. 1F), reflecting concomitant changes in microbial activities and soil iron and sulfur cycling. The pyrite prediction equation accurately predicted soil pyrite ratios based on cDNA content (Fig. S4C), confirming that microbial activity mainly controlled pyrite formation.

The best-fit pyrite prediction equation contains multiple metabolic guilds, such as SRP, methylotrophs, and predators (Table 3), although clearly SRP comprise the dominant metabolic guild in the CASS system (Ling et al., 2018; 2015), and their metabolic product (sulfide) is the limiting factor to forming pyrite. A previous study reported that microbial predation can decrease SRP growth and metabolic yields (Qiu et al., 2016). *Methylobacteriaceae* is one of the most abundant taxa in the sulfide-bearing sediments that experience periodic dry-down and wet-up (Jones et al., 2017), and is also part of the best-fit pyrite prediction equation. Thus, the accuracy of this relationship was improved by inclusion of potential microbial network interactions.

In our previous study, we observed sequential microbial guild resuscitations across different dry-down and wet-up tidal stages (Ling et al., 2018). So called “early responders” increased in activity during the initial stages of seawater inundation, while “delayed responders” increased in activity during late wet-up stage. The pyrite prediction equation also accounts for such time-dependence in the activity of different microbial taxa (Figs. S4D and S4E). For example, *Acidobacteria Gp 3* (taxon0089) and *Gammaproteobacteria* (taxon0160) were identified as early and delayed responders, respectively, in our previous study (Ling et al., 2018). Sequential microbial resuscitations might account for the observed pyrite and iron monosulfide accumulations during two distinct periods (early and late wet-up stages, Figs. 2A and 2B). Since microbial activity changes quickly (over hours) during tidal inundation treatment (Ling et al., 2018), it is possible that more than one metabolic group was ultimately responsible for net iron sulfide formation.

We note that the best-fit pyrite prediction equation is based on four different dry-down and wet-up tidal stages (symmetrically across two days to avoid night sampling in crocodile inhabited waters). Some factors that could influence bioremediation efficiency over a more extended time period were: minerals preserved in organic matter, increasing temperature, changing rainfall patterns, and day/night (i.e. wetting/drying) shifts. We observed that iron-sulfide minerals preserved labile organic carbon from microbial degradation in the system (Ling et al., 2015). Forming iron sulfide minerals is the primary goal to remediate soil acidity in the CASS systems, and higher ratios of iron sulfide minerals could change organic matter availability and thus further influence microbial metabolic efficiency. In the future, a greater contrast in precipitation between wet and dry seasons is expected due to

climate change (Trenberth *et al.*, 2014). It is predicted that the temperature will be warmer by 1.2 to 4.2°C, and the rainfall will change by -40 to +5% in the southeast region of Australia by 2090 (Reid and Mosley, 2016). When the evaporation rates exceed precipitation rates due to higher temperature, such as with summertime in the Netherlands, coastal acid sulfate soils will release more sulfuric acid to nearby ecosystems than during any other season (Vermaat *et al.*, 2016). Microbes have displayed resuscitation sequencing in response to rewetting events such as rainfall (Placella *et al.*, 2012) and tidal inundation (Ling *et al.*, 2018). Therefore, prolonged rainfall may generate different microbial metabolic yields to multiple short periods of rain. A previous study showed that phagotrophic protists are more active at night, compared to daytime, in a subtropical gyre (Hu *et al.*, 2018), while another study reported that the existence of protists increases microbial sulfate reduction activity in a sludge reactor (Hirakata *et al.*, 2016). It is possible that protists engulfing prokaryotes displayed different activity patterns between day and night, hence impacting the overall dynamics of bioremediation. For long-term remediation efficiency in acid sulfate soils, such environmental factors should be considered and studied in more detail.

Compared to soil models such as RothC and CENTURY that are designed for predicting soil organic carbon (Farage *et al.*, 2007; Molina *et al.*, 2017), artificial intelligence packages provide flexible options for researchers to customize modelling targets. For example, previous studies have used Eureka to predict bacterial assemblages in marine systems (Larsen *et al.*, 2012), and microbial taxonomic and functional structures in acid mine drainage (Kuang *et al.*, 2016). Here we have modelled microbial activity to predict soil pyrite ratios in coastal acid sulfate soils.

However, results from artificial intelligence packages are not always straightforward and often require further interpretation to decrypt key relationships between the parameters that are listed in the predictive algorithms.

#### 4.3 Microbial interactions changed during different dry-down and wet-up tidal stages

Although organic carbon fuels bacterial sulfide generation, we did not observe variations in organic carbon to correlate with pyrite or iron monosulfide levels (Figs. 2A-C). Instead, when seawater entered the CASS system during flood tide, we observed that cDNA contents of SRP increased and were accompanied by pyrite and iron monosulfide accumulations. However, SRP decreased their cDNA content at ebb tide, whereas pyrite and iron monosulfide levels exhibited another concentration peak at this stage, obfuscating this relationship somewhat. Furthermore, SRP decreased in activity at a tidal stage during which their environment still contained a high abundance of organic carbon, suggesting that other parameters controlled SRP activity.

The identification of classified and uncultured SRP (Fig. S5) allowed us to compare physiological characteristics between these two groups. Order *Desulfuromonadales* was observed in 16S datasets only, but in neither *dsrA* or *dsrB* sequences, which suggests that *Desulfuromonadales dsr* genes may differ from those of strain *Desulfuromonadales* bacterium Tc37 (reference sequence). Compared with classified SRP that increased in cDNA content during flood and high tides (Fig. 2D), uncultured SRP increased in cDNA content quickly during ebb tide (Fig. 2E). Both classified and uncultured SRP utilize sulfate as the electron acceptor, and ebb tides displayed the highest organic carbon contents during different dry-down and wet-up tidal stages

(Fig. 2C), indicating that the decreasing activity of classified SRP during the ebb tide was not limited by the availability of organic substrate. Both predators and classified SRP increased their cDNA levels during flood and high tides (Fig. 2F), and corresponding changes in predators and classified SRP cDNA levels were observed at flood tide (Figs. 3). This observation supports a “kill the winner” hypothesis (Maslov and Sneppen, 2016), in which SRP forming dominant metabolic guild in the system become substrates for microbial predation.

To further investigate microbial predator-prey relationships, we built microbial association networks for each tidal stage (Fig. 5). The interactions of predators during different dry-down and wet-up tidal stages showed that they played a “keystone” role during early and middle wet-up stages (flood and high tides). Keystone species have significant influence on the community, and form higher level nodes in microbial co-occurrence networks (Berry and Widder, 2014). We also observed that keystone species consisted of the predators’ first neighbors in microbial networks during early and middle wet-up stages (flood and high tides). Classified SRP are among the predators’ first and second neighbors, which supports our hypothesis that predation influenced classified SRP activity during these wet-up stages. Microbial predation on classified SRP likely created opportunities for uncultured SRP, potentially having a narrower environmental niche, to become more active during delayed wet-up stage (ebb tides). Since classified SRP taxa decreased in activity during ebb tides, while pyrite and iron monosulfide still accumulated, we may assume that uncultured SRP also contributed significantly to total iron sulfide formation.

In summary, our observations confirm that microbial activity controls iron and sulfur speciation, and serves as an accurate predictor for pyrite (re)precipitation in CASS bioremediation. We discovered that microorganisms displayed at least two different interaction patterns that influenced iron sulfide formation at the early and late wet-up stages (Fig 5). Classified SRP were early responders to tidal inundation and became abundant taxa in the system, which induced microbial predation and decreased their activity during late wet-up. Microbial predation on classified SRP taxa created ecological space for uncultured SRP taxa to proliferate and further drive iron sulfide formation. Uncultured SRP increased their activity quickly during ebb tides, and also contributed to net pyrite formation. Our work reveals the need to consider a complex interplay of geochemical parameters and microbial interactions in the (bio)remediation of CASS ecosystems.

## **Acknowledgements**

The authors acknowledge funding to JWM from the Australian Research Council (ARC LP110100732). We thank Drs. Kathryn Holt, Shu Mei Teo and Andre Mu (University of Melbourne) for access to and assistance with computational biology resources, Dr. Caitlin M. Gionfriddo (Oak Ridge National Laboratory) for important advice on writing and manuscript structures, and Mr. Steve Wilbraham (Queensland Government) for invaluable assistance with fieldwork and sampling at the East Trinity field site.

## **Declaration of interests**

The authors declare that they have no known competing financial interests or personal relationships that could have appeared to influence the work reported in this paper.

668

## 669 **Figure legends**

670 **Fig. 1** Field data of poorly crystalline Fe and pyrite-S fractions of (A) a previous  
671 study (Keene et al., 2010) and (B, C) this study. Samples were grouped based on  
672 tidal stages in (B), and on biogeochemical zones in (C). (D) The distribution of  
673 biogeochemical zones in the study site. (E) Correlations between DOS and DOP  
674 values in soil samples. (F) Beta diversity analysis comparing microbial taxonomic  
675 structural similarity of cDNA samples. The poorly crystalline Fe, pyrite-S, and  
676 organic carbon fractions were significantly correlated to microbial cDNA taxonomic  
677 structure.

678

679 **Fig. 2** Environmental parameters and microbial activities, including (A) pyrite  
680 contents, (B) iron monosulfide content, (C) organic carbon content, (D) classified  
681 SRP activity, (E) uncultured SRP activity, and (F) predator activity across different  
682 dry-down and wet-up tidal stages. In the boxplots, upper and lower bars represent  
683 maxima and minima, respectively, excluding outliers plotted as points. The upper and  
684 lower portions of boxes from the first and third quartiles, respectively, while the lines  
685 inside boxes are sample medians.

686

687 **Fig. 3** Correlations between cDNA contents of classified SRP and predators in (A)  
688 low tide, (B) flood tide, (C) high tide, and (D) ebb tide.

689

690 **Fig. 4** Microbial networks of all OTUs, predators' first and second neighbors across  
691 four tidal stages. Each node represents an OTU or environmental parameter, and

edges that connect OTUs or parameters represent either positive (yellow line) or negative (blue dashed line) correlations between the two nodes.

**Fig. 5** Conceptual model showing the trend in relative activity of classified and uncultured SRP, predators, early and delayed responders over different dry-down and wet-up tidal stages.

# **Table legends**

**Table 1** The pyrite predicting equation and the taxonomic information of the selected taxa in the East Trinity coastal acid sulfate soil wetlands. Detailed taxonomic information of taxon089, taxon492, taxon694, and taxon160 are listed in Table S3.

**Table 2** The taxonomic information of bacterial predators in the East Trinity coastal acid sulfate soil wetlands.

708

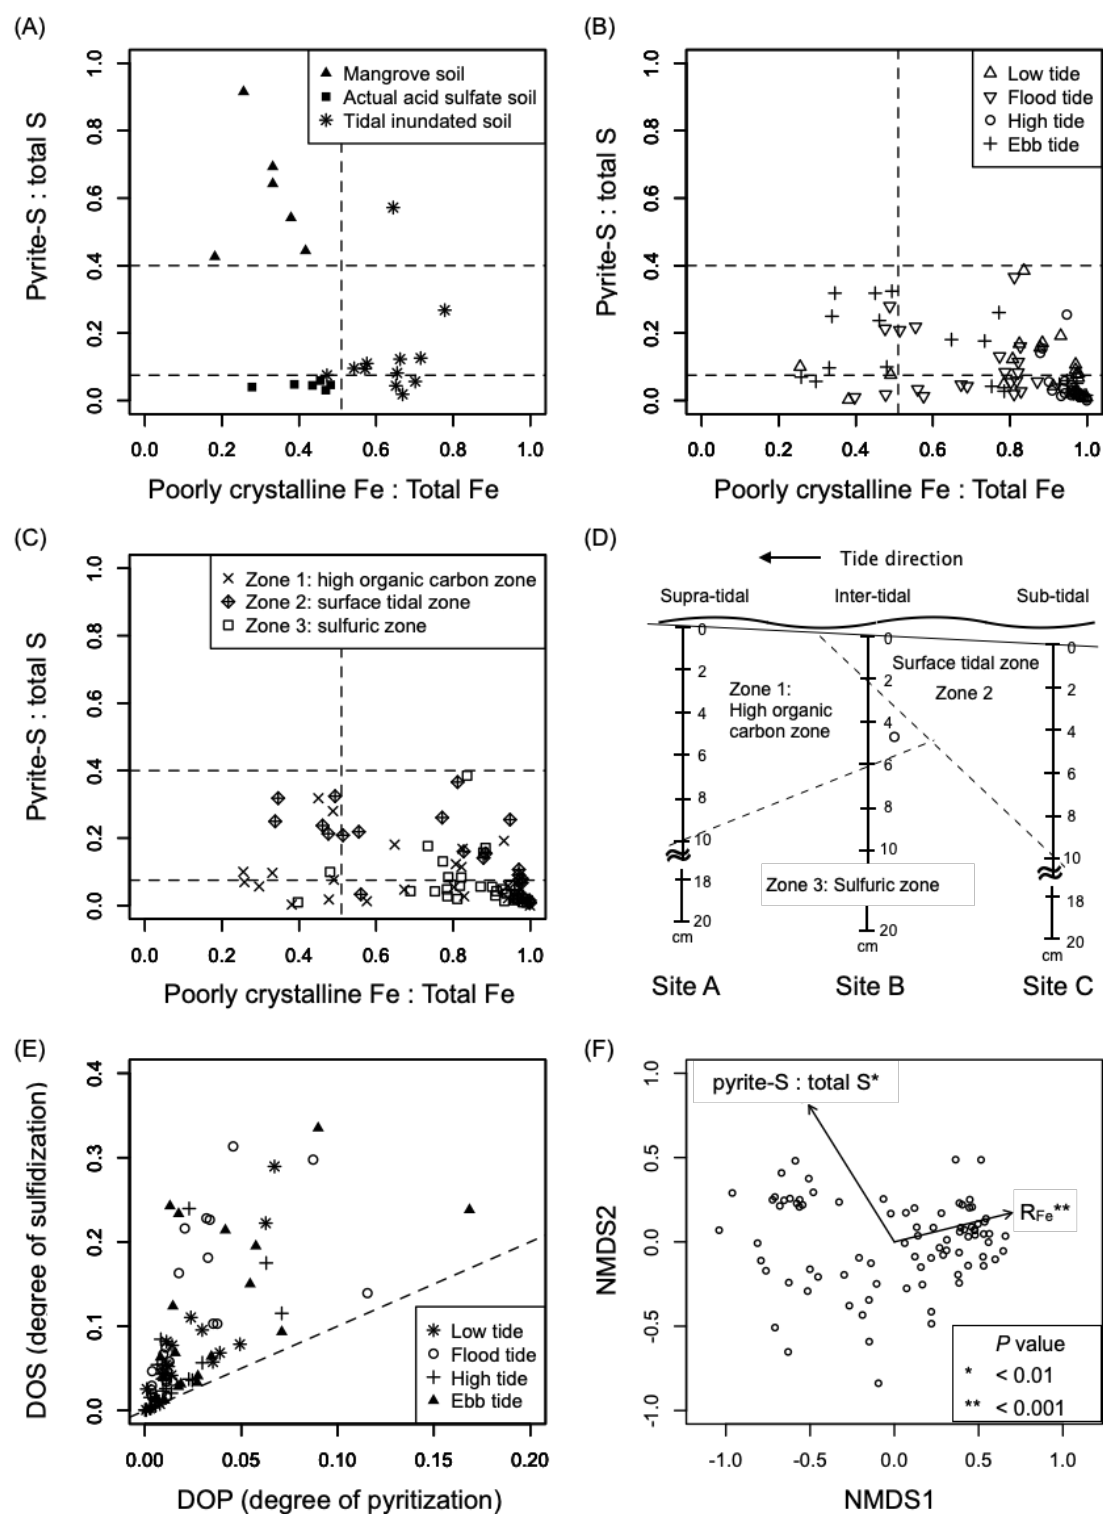

709

710 **Fig. 1**

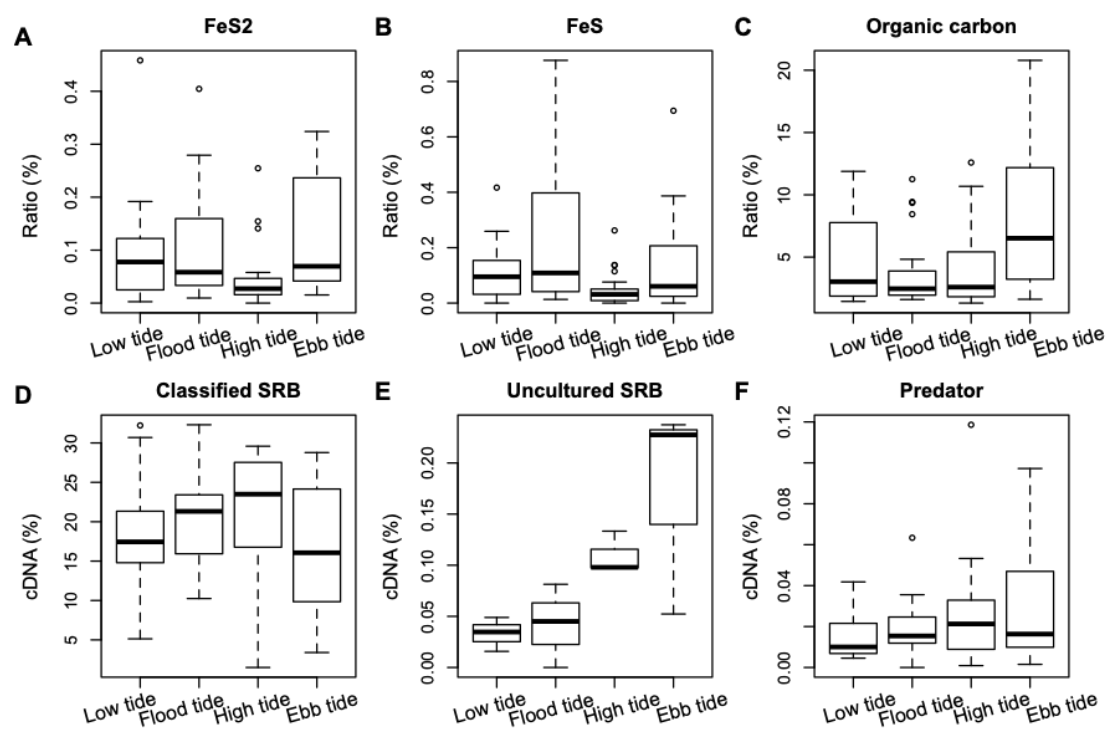

**Fig. 2**

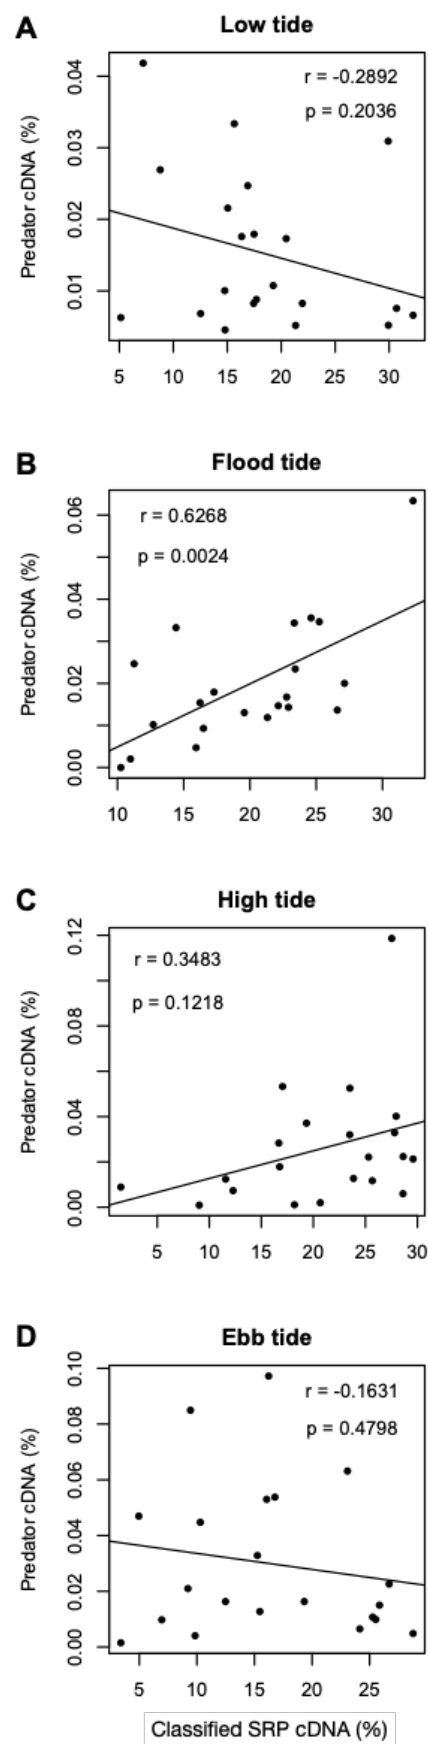

**Fig. 3**

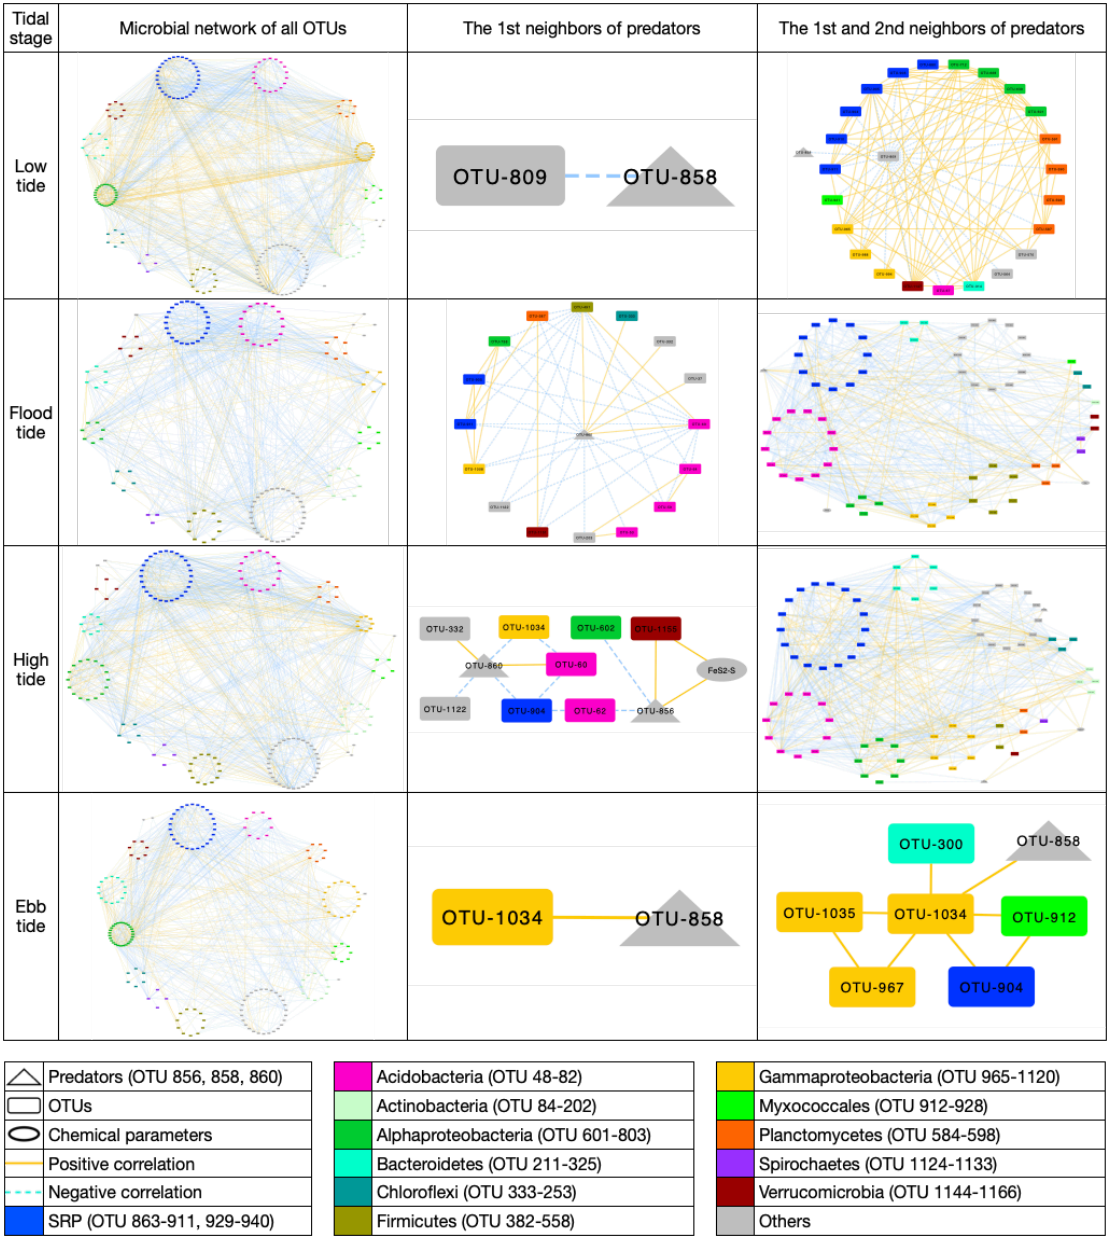

**Fig. 4**

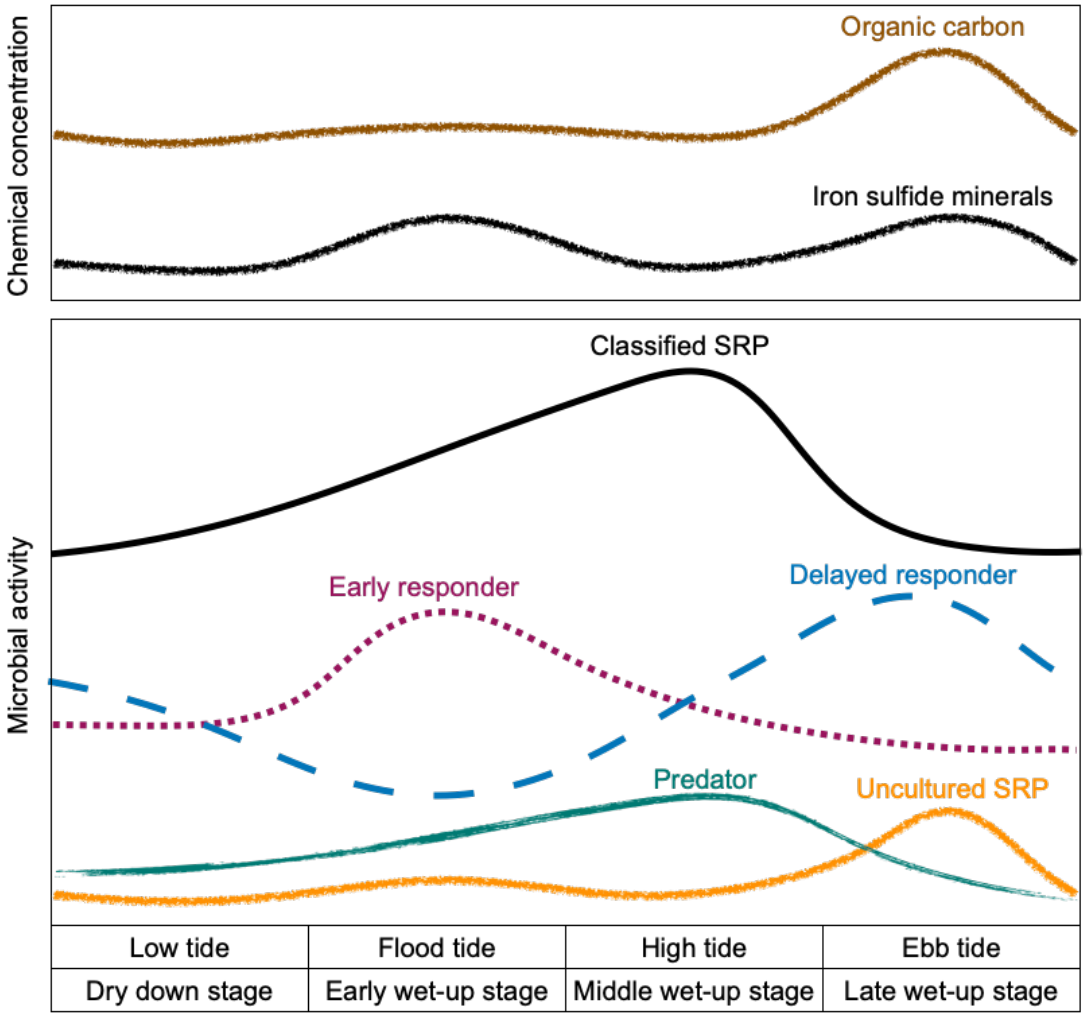

**Fig. 5**

719 **Table 1**

|           |                                                                                                                                                                                                                                                                                                           |          |                |                     |                   |                     |               |
|-----------|-----------------------------------------------------------------------------------------------------------------------------------------------------------------------------------------------------------------------------------------------------------------------------------------------------------|----------|----------------|---------------------|-------------------|---------------------|---------------|
| Formula   | $S\text{ ratio} = 0.02406 + \text{taxon0893} + 13.28 * \text{taxon1960} + 0.02406 * \text{taxon0941} + \text{taxa0160} * \text{taxon0492} + \text{taxon1730} * \text{taxon1739} + 1229 * \text{taxon0089} * \text{taxon0892} * \text{taxon1713} - \text{taxon0694} - \text{taxon1531} * \text{taxon1784}$ |          |                |                     |                   |                     |               |
| Taxa      | OTU                                                                                                                                                                                                                                                                                                       | Kingdom  | Phylum         | Class               | Order             | Family              | Genus         |
| taxon0892 | OTU0035                                                                                                                                                                                                                                                                                                   | Archaea  | Euryarchaeota  | Thermoplasmata      | unclassified      | unclassified        | unclassified  |
| taxon0893 | OTU0036                                                                                                                                                                                                                                                                                                   | Archaea  | Euryarchaeota  | unclassified        | unclassified      | unclassified        | unclassified  |
| taxon0089 |                                                                                                                                                                                                                                                                                                           | Bacteria | Acidobacteria  | Acidobacteria Gp3   |                   |                     |               |
| taxon0941 | OTU0084                                                                                                                                                                                                                                                                                                   | Bacteria | Actinobacteria | Actinobacteria      | Acidimicrobiales  | Acidimicrobiaceae   | Ilumatobacter |
| taxon0492 |                                                                                                                                                                                                                                                                                                           | Bacteria | Actinobacteria | Actinobacteria      | Actinomycetales   | Microbacteriaceae   |               |
| taxon1531 | OTU0674                                                                                                                                                                                                                                                                                                   | Bacteria | Proteobacteria | Alphaproteobacteria | Rhizobiales       | Rhodobiaceae        | unclassified  |
| taxon0694 |                                                                                                                                                                                                                                                                                                           | Bacteria | Proteobacteria | Alphaproteobacteria | Rhizobiales       | Methylobacteriaceae |               |
| taxon1713 | OTU0856                                                                                                                                                                                                                                                                                                   | Bacteria | Proteobacteria | Deltaproteobacteria | Bdellovibrionales | Bacteriovoraceae    | Bacteriovorax |
| taxon1730 | OTU0873                                                                                                                                                                                                                                                                                                   | Bacteria | Proteobacteria | Deltaproteobacteria | Desulfobacterales | Desulfobacteraceae  | Desulfofaba   |
| taxon1739 | OTU0882                                                                                                                                                                                                                                                                                                   | Bacteria | Proteobacteria | Deltaproteobacteria | Desulfobacterales | Desulfobacteraceae  | unclassified  |
| taxon1784 | OTU0927                                                                                                                                                                                                                                                                                                   | Bacteria | Proteobacteria | Deltaproteobacteria | Myxococcales      | Polyangiaceae       | unclassified  |
| taxon0160 |                                                                                                                                                                                                                                                                                                           | Bacteria | Proteobacteria | Gammaproteobacteria |                   |                     |               |
| taxon1960 | OTU1103                                                                                                                                                                                                                                                                                                   | Bacteria | Proteobacteria | Gammaproteobacteria | Vibrionales       | Vibrionaceae        | Vibrio        |

720

721

722 **Table 2**

|          |                |                     |                   |                    |               |
|----------|----------------|---------------------|-------------------|--------------------|---------------|
| Kingdom  | Phylum         | Class               | Order             | Family             | Genus         |
| Bacteria | Proteobacteria | Deltaproteobacteria | Bdellovibrionales | Bacteriovoraceae   | Bacteriovorax |
|          |                |                     |                   |                    | Peredibacter  |
|          |                |                     |                   |                    | unclassified  |
|          |                |                     |                   | Bdellovibrionaceae | Bdellovibrio  |
|          |                |                     |                   |                    | Vampirovibrio |

723

724

## References

- Aanderud, Z.T., Jones, S.E., Fierer, N., Lennon, J.T., 2015. Resuscitation of the rare biosphere contributes to pulses of ecosystem activity. *Frontiers in Microbiology* 6, 1–11. doi:10.3389/fmicb.2015.00024
- Awolusi, O.O., Nasr, M., Kumari, S., Bux, F., 2016. Artificial Intelligence for the Evaluation of Operational Parameters Influencing Nitrification and Nitrifiers in an Activated Sludge Process. *Microbial Ecology* 72, 49–63. doi:10.1007/s00248-016-0739-3
- Azman, E.A., Jusop, S., Ishak, C.F., Ismail, R., 2014. Increasing rice production using different lime sources on an acid sulphate soil in Merbok, Malaysia. *Pertanika Journal of Tropical Agricultural Science* 37, 223–247.
- Benjamini, Y., Hochberg, Y., 1995. Controlling the False Discovery Rate - a Practical and Powerful Approach to Multiple Testing. *Journal of the Royal Statistical Society Series B-Methodological* 57, 289–300. doi:10.2307/2346101
- Berner, R.A., 1970. Sedimentary pyrite formation. *American Journal of Science* 268, 1–23.
- Berry, D., Widder, S., 2014. Deciphering microbial interactions and detecting keystone species with co-occurrence networks. *Frontiers in Microbiology* 5, 219. doi:10.3389/fmicb.2014.00219
- Billon, G., 2001. Chemical speciation of sulfur compounds in surface sediments from three bays (Fresnaye, Seine and Authie) in northern France, and identification of some factors controlling their generation. *Talanta* 53, 971–981. doi:10.1016/S0039-9140(00)00586-5

748 Blazewicz, S.J., Barnard, R.L., Daly, R.A., Firestone, M.K., 2013. Evaluating rRNA  
749 as an indicator of microbial activity in environmental communities: limitations  
750 and uses. *The ISME Journal* 7, 2061–2068. doi:10.1038/ismej.2013.102

751 Boesen, C., Postma, D., 1988. Pyrite formation in anoxic environments of the Baltic.  
752 *American Journal of Science* 288, 575–603. doi:10.2475/ajs.288.6.575

753 Brown, M.B., 1975. 400: A Method for Combining Non-Independent, One-Sided  
754 Tests of Significance. *Biometrics* 31, 987. doi:10.2307/2529826

755 Burton, E.D., Bush, R.T., Johnston, S.G., Sullivan, L.A., 2011. Sulfur biogeochemical  
756 cycling and novel Fe–S mineralization pathways in a tidally re-flooded wetland.  
757 *Geochimica Et Cosmochimica Acta* 75, 3434–3451.  
758 doi:10.1016/j.gca.2011.03.020

759 Burton, E.D., Bush, R.T., Sullivan, L.A., Hocking, R.K., Mitchell, D.R., Johnston,  
760 S.G., Fitzpatrick, R.W., Raven, M., McClure, S., Jang, L.Y., 2009. Iron-  
761 monosulfide oxidation in natural sediments: resolving microbially mediated S  
762 transformations using XANES, electron microscopy, and selective extractions.  
763 *Environmental Science & Technology* 43, 3128–3134.

764 Burton, E.D., Bush, R.T., Sullivan, L.A., Mitchell, D.R.G., 2007. Reductive  
765 transformation of iron and sulfur in schwertmannite-rich accumulations  
766 associated with acidified coastal lowlands. *Geochimica Et Cosmochimica Acta*  
767 71, 4456–4473. doi:10.1016/j.gca.2007.07.007

768 Burton, E.D., Sullivan, L.A., Bush, R.T., Johnston, S.G., Keene, A.F., 2008. A simple  
769 and inexpensive chromium-reducible sulfur method for acid-sulfate soils. *Applied*  
770 *Geochemistry* 23, 2759–2766. doi:10.1016/j.apgeochem.2008.07.007

771 Bush, R.T., Fyfe, D., Sullivan, L.A., 2004. Occurrence and abundance of  
772 monosulfidic black ooze in coastal acid sulfate soil landscapes. Australian Journal  
773 of Soil Research 42, 609–616. doi:10.1071/SR03077

774 Claff, S.R., Sullivan, L.A., Burton, E.D., Bush, R.T., 2010. A sequential extraction  
775 procedure for acid sulfate soils: Partitioning of iron. Geoderma 155, 224–230.  
776 doi:10.1016/j.geoderma.2009.12.002

777 Clarke, K.R., 1993. Non-parametric multivariate analyses of changes in community  
778 structure. Australian Journal of Ecology 18, 117–143.

779 Cole, J.R., Wang, Q., Fish, J.A., Chai, B., McGarrell, D.M., Sun, Y., Brown, C.T.,  
780 Porras-Alfaro, A., Kuske, C.R., Tiedje, J.M., 2013. Ribosomal Database Project:  
781 data and tools for high throughput rRNA analysis. Nucleic Acids Research 42,  
782 D633–D642. doi:10.1093/nar/gkt1244

783 DeAngelis, K.M., Silver, W.L., Thompson, A.W., Firestone, M.K., 2010. Microbial  
784 communities acclimate to recurring changes in soil redox potential status.  
785 Environmental Microbiology 12, 3137–3149. doi:10.1111/j.1462-  
786 2920.2010.02286.x

787 D’Alelio, D., Rampone, S., Cusano, L.M., Morfino, V., Russo, L., Sanseverino, N.,  
788 Cloern, J.E., Lomas, M.W., 2020. Machine learning identifies a strong association  
789 between warming and reduced primary productivity in an oligotrophic ocean  
790 gyre. Scientific Reports 10, 979–12. doi:10.1038/s41598-020-59989-y

791 Edgar, R.C., Haas, B.J., Clemente, J.C., Quince, C., Knight, R., 2011. UCHIME  
792 improves sensitivity and speed of chimera detection. Bioinformatics 27, 2194–  
793 2200. doi:10.1093/bioinformatics/btr381

794 Estrada-de los Santos, P., Bustillos-Cristales, R., Caballero-Mellado, J., 2001.  
795 Burkholderia, a Genus Rich in Plant-Associated Nitrogen Fixers with Wide

796 Environmental and Geographic Distribution. Applied and Environmental  
797 Microbiology 67, 2790–2798. doi:10.1128/AEM.67.6.2790-2798.2001

798 Farage, P., Ardo, J., Olsson, L., Rienzi, E., Ball, A., Pretty, J., 2007. The potential for  
799 soil carbon sequestration in three tropical dryland farming systems of Africa and  
800 Latin America: A modelling approach. Soil and Tillage Research 94, 457–472.  
801 doi:10.1016/j.still.2006.09.006

802 Faust, K., Raes, J., 2016. CoNet app: inference of biological association networks  
803 using Cytoscape. F1000Research 5, 1519. doi:10.12688/f1000research.9050.1

804 Faust, K., Sathirapongsasuti, J.F., Izard, J., Segata, N., Gevers, D., Raes, J.,  
805 Huttenhower, C., 2012. Microbial Co-occurrence Relationships in the Human  
806 Microbiome. PLoS Computational Biology 8, e1002606.  
807 doi:10.1371/journal.pcbi.1002606.s013

808 Fitzpatrick, R.W., 2003. Overview of acid sulfate soil properties, environmental  
809 hazards, risk mapping and policy development in Australia. Advances in  
810 Regolith. Proceedings of the CRC LEME Regional Regolith Symposia, CRC  
811 LEME, Bentley, WA. 2003.

812 Gagnon, C., Mucci, A., Pelletier, E., 1995. Anomalous accumulation of acid-volatile  
813 sulphides (AVS) in a coastal marine sediment, Saguenay Fjord, Canada.  
814 Geochimica Et Cosmochimica Acta 59, 2663–2675. doi:10.1016/0016-  
815 7037(95)00163-t

816 Geets, J., Borremans, B., Diels, L., Springael, D., Vangronsveld, J., van der Lelie, D.,  
817 Vanbroekhoven, K., 2006. DsrB gene-based DGGE for community and diversity  
818 surveys of sulfate-reducing bacteria. Journal of Microbiological Methods 66,  
819 194–205. doi:10.1016/j.mimet.2005.11.002

820 Hicks, S.A., 2003. Acidic airport drainage, 20 years and \$20 million worth of  
821 experience 489–493.

822 Hicks, W., Bowman, G., Fitzaptrick, R.W., 1999. East Trinity Acid Sulfate Soils: Part  
823 1: Environmental Hazards. CSIRO PUBLISHING, Adelaide.

824 Hirakata, Y., Oshiki, M., Kuroda, K., Hatamoto, M., Kubota, K., Yamaguchi, T.,  
825 Harada, H., Araki, N., 2016. Effects of Predation by Protists on Prokaryotic  
826 Community Function, Structure, and Diversity in Anaerobic Granular Sludge.  
827 Microbes and Environments 31, 279–287. doi:10.1264/jsme2.ME16067

828 Hoehler, T., 2004. Biological energy requirements as quantitative boundary  
829 conditions for life in the subsurface. Geobiology 2, 205–215. doi:10.1111/j.1472-  
830 4677.2004.00033.x

831 Hu, S.K., Connell, P.E., Mesrop, L.Y., Caron, D.A., 2018. A Hard Day's Night: Diel  
832 Shifts in Microbial Eukaryotic Activity in the North Pacific Subtropical Gyre.  
833 Frontiers in Marine Science 5, 205–17. doi:10.3389/fmars.2018.00351

834 Jaccard, P., 1908. Nouvelles recherches sur la distribution florale. Bull. Soc. Vaud.  
835 Sci. Nat. 44, 223–270.

836 Johnston, S., Keene, A., Bush, R., 2009a. Remediation of coastal acid sulfate soils by  
837 tidal inundation: Effectiveness and geochemical implications. Proceedings of 18th  
838 NSW Coastal Conference, Ballina, NSW, 3-6 November, East Coast  
839 Conferences, Coffs Harbour, NSW.

840 Johnston, S.G., Bush, R.T., Sullivan, L.A., Burton, E.D., Smith, D., Martens, M.A.,  
841 McElnea, A.E., Ahern, C.R., Powell, B., Stephens, L.P., Wilbraham, S.T., van  
842 Heel Simon, 2009b. Changes in water quality following tidal inundation of  
843 coastal lowland acid sulfate soil landscapes. Estuarine, Coastal and Shelf Science  
844 81, 257–266. doi:10.1016/j.ecss.20

845 Johnston, S.G., Keene, A.F., Burton, E.D., Bush, R.T., Sullivan, L.A., 2012.  
846 Quantifying alkalinity generating processes in a tidally remediating acidic  
847 wetland. *Chemical Geology* 304, 106–116. doi:10.1016/j.chemgeo.2012.02.008  
848 Johnston, S.G., Keene, A.F., Burton, E.D., Bush, R.T., Sullivan, L.A., McElnea, A.,  
849 Ahern, C.R., Smith, C.D., Powell, B., Hocking, R.K., 2010. Arsenic mobilization  
850 in a seawater inundated acid sulfate soil. *Environmental Science & Technology*  
851 44, 1968–1973. doi:10.1021/es903114z  
852 Johnston, S.G., Keene, A.F., Bush, R.T., Burton, E.D., Sullivan, L.A., Smith, D.,  
853 McElnea, A.E., Martens, M.A., Wilbraham, S., 2009c. Contemporary  
854 pedogenesis of severely degraded tropical acid sulfate soils after introduction of  
855 regular tidal inundation. *Geoderma* 149, 335–346.  
856 doi:10.1016/j.geoderma.2008.12.013  
857 Jones, D.S., Lapakko, K.A., Wenz, Z.J., Olson, M.C., Roepke, E.W., Sadowsky, M.J.,  
858 Novak, P.J., Bailey, J.V., 2017. Novel Microbial Assemblages Dominate  
859 Weathered Sulfide-Bearing Rock from Copper-Nickel Deposits in the Duluth  
860 Complex, Minnesota, USA. *Applied and Environmental Microbiology* 83, 1–15.  
861 doi:10.1128/AEM.00909-17  
862 Jones, S.E., Lennon, J.T., 2010. Dormancy contributes to the maintenance of  
863 microbial diversity. *Proceedings of the National Academy of Sciences of the*  
864 *United States of America* 107, 5881–5886. doi:10.1073/pnas.0912765107  
865 Keene, A.F., Johnston, S.G., Bush, R.T., Sullivan, L.A., Burton, E.D., McElnea, A.E.,  
866 Ahern, C.R., Powell, B., 2010. Effects of hyper-enriched reactive Fe on  
867 sulfidisation in a tidally inundated acid sulfate soil wetland. *Biogeochemistry*  
868 103, 263–279. doi:10.1007/s10533-010-9461-2

869 Klindworth, A., Pruesse, E., Schweer, T., Peplies, J., Quast, C., Horn, M., Glöckner,  
870 F.O., 2013. Evaluation of general 16S ribosomal RNA gene PCR primers for  
871 classical and next-generation sequencing-based diversity studies. *Nucleic Acids*  
872 *Research* 41, e1. doi:10.1093/nar/gks808

873 Kondo, R., Nedwell, D.B., Purdy, K.J., Silva, S.Q., 2004. Detection and Enumeration  
874 of Sulphate-Reducing Bacteria in Estuarine Sediments by Competitive PCR.  
875 *Geomicrobiology Journal* 21, 145–157. doi:10.1080/01490450490275307

876 Kozich, J.J., Westcott, S.L., Baxter, N.T., Highlander, S.K., Schloss, P.D., 2013.  
877 Development of a dual-index sequencing strategy and curation pipeline for  
878 analyzing amplicon sequence data on the MiSeq Illumina sequencing platform.  
879 *Applied and Environmental Microbiology* 79, 5112–5120.  
880 doi:10.1128/AEM.01043-13

881 Kuang, J., Huang, L., He, Z., Chen, L., Hua, Z., Jia, P., Li, S., Liu, J., Li, J., Zhou, J.,  
882 Shu, W., 2016. Predicting taxonomic and functional structure of microbial  
883 communities in acid mine drainage. *The ISME Journal* 10, 1527–1539.  
884 doi:10.1038/ismej.2015.201

885 Kuever, J., 2014. The family Desulfobacteraceae 45–73. doi:10.1007/978-3-642-  
886 30194-0

887 Larsen, P.E., Field, D., Gilbert, J.A., 2012. Predicting bacterial community  
888 assemblages using an artificial neural network approach. *Nature Methods* 9, 621–  
889 625. doi:10.1038/nmeth.1975

890 Lennon, J.T., Jones, S.E., 2011. Microbial seed banks: the ecological and  
891 evolutionary implications of dormancy. *Nature Reviews Microbiology* 9, 119–  
892 130. doi:10.1038/nrmicro2504

893 Lesnik, K.L., Liu, H., 2017. Predicting Microbial Fuel Cell Biofilm Communities and  
894 Bioreactor Performance using Artificial Neural Networks. *Environmental Science*  
895 & *Technology* 51, 10881–10892. doi:10.1021/acs.est.7b01413

896 Ling, Y.-C., Berwick, L., Tulipani, S., Grice, K., Bush, R., Moreau, J.W., 2015.  
897 Distribution of iron- and sulfate-reducing bacteria across a coastal acid sulfate  
898 soil (CASS) environment: implications for passive bioremediation by tidal  
899 inundation. *Frontiers in Microbiology* 6, 624. doi:10.3389/fmicb.2015.00624

900 Ling, Y.-C., Gan, H.M., Bush, M., Bush, R., Moreau, J.W., 2018. Time-resolved  
901 microbial guild responses to tidal cycling in a coastal acid-sulfate system.  
902 *Environmental Chemistry* 15, 2–17.

903 Ljung, K., Maley, F., Cook, A., Weinstein, P., 2009. Acid sulfate soils and human  
904 health—A Millennium Ecosystem Assessment. *Environment International* 35,  
905 1234–1242. doi:10.1016/j.envint.2009.07.002

906 Maslov, S., Sneppen, K., 2016. Population cycles and species diversity in dynamic  
907 Kill-the-Winner model of microbial ecosystems. *Scientific Reports* 7, 1–8.  
908 doi:10.1038/srep39642

909 Meyer, K.M., Petersen, I.A.B., Tobi, E., Korte, L., Bohannan, B.J.M., 2019. Use of  
910 RNA and DNA to Identify Mechanisms of Bacterial Community  
911 Homogenization. *Frontiers in Microbiology* 10, 19–13.  
912 doi:10.3389/fmicb.2019.02066

913 Meysman, F., Middelburg, J.J., 2005. Acid-volatile sulfide (AVS)—a comment.  
914 *Marine Chemistry* 97, 206–212.

915 Minh, L.Q., Tuong, T.P., Van Mensvoort, M., Bouma, J., 1997. Contamination of  
916 surface water as affected by land use in acid sulfate soils in the Mekong River  
917 Delta, Vietnam. *Agriculture, Ecosystems & Environment* 61, 19–27.

918 Molina, L.G., Moreno Pérez, E.D.C., Pérez, A.B., 2017. Simulation of soil organic  
919 carbon changes in Vertisols under conservation tillage using the RothC model.  
920 Scientia Agricola 74, 235–241. doi:10.1590/1678-992x-2015-0487

921 Moreau, J.W., Fournelle, J.H., Banfield, J.F., 2013. Quantifying heavy metals  
922 sequestration by sulfate-reducing bacteria in an Acid mine drainage-contaminated  
923 natural wetland. Frontiers in Microbiology 4, 43. doi:10.3389/fmicb.2013.00043

924 Mori, K., SUZUKI, K.I., Urabe, T., Sugihara, M., Tanaka, K., Hamada, M., Hanada,  
925 S., 2011. Thioprofundum hispidum sp. nov., an obligately chemolithoautotrophic  
926 sulfur-oxidizing gammaproteobacterium isolated from the hydrothermal field on  
927 Suiyo Seamount, and proposal of Thioalkalispiraceae fam. nov. in the order  
928 Chromatiales. International Journal of Systematic and Evolutionary Microbiology  
929 61, 2412–2418. doi:10.1099/ijs.0.026963-0

930 Müller, A.L., Kjeldsen, K.U., Rattei, T., Pester, M., Loy, A., 2015. Phylogenetic and  
931 environmental diversity of DsrAB-type dissimilatory (bi) sulfite reductases. The  
932 ISME Journal 9, 1152–1165. doi:10.1038/ismej.2014.208

933 Myler, C., 2010. Indonesian Smallholders: Fisheries R and D Nets Improved  
934 Livelihoods for Indonesian Farmers 1–2.

935 Navarro-García, F., Casermeiro, M.Á., Schimel, J.P., 2012. When structure means  
936 conservation: Effect of aggregate structure in controlling microbial responses to  
937 rewetting events. Soil Biology and Biochemistry 44, 1–8.  
938 doi:10.1016/j.soilbio.2011.09.019

939 Oksanen, J., Blanchet, F.G., Kindt, R., Legendre, P., Minchin, P.R., O’Hara, R.B.,  
940 Simpson, G.L., Solymos, P., Stevens, M., Wagner, H., 2015. vegan: Community  
941 Ecology Package. R package version 2.0-10. 2013.

942 Park, J., Ki, D., Kim, K., Lee, S.J., Kim, D.H., Oh, K.J., 2011. Using decision tree to  
 943 develop a soil ecological quality assessment system for planning sustainable  
 944 construction. *Expert Systems with Applications* 38, 5463–5470.  
 945 doi:10.1016/j.eswa.2010.10.007

946 Perez-Jimenez, J.R., Young, L.Y., Kerkhof, L.J., 2001. Molecular characterization of  
 947 sulfate-reducing bacteria in anaerobic hydrocarbon-degrading consortia and pure  
 948 cultures using the dissimilatory sulfite reductase (dsrAB) genes 35, 145–150.  
 949 doi:10.1111/j.1574-6941.2001.tb00798.x

950 Picard, A., Gartman, A., Cosmidis, J., Obst, M., Vidoudez, C., Clarke, D.R., Girguis,  
 951 P.R., 2019. Authigenic metastable iron sulfide minerals preserve microbial  
 952 organic carbon in anoxic environments. *Chemical Geology* 530, 119343–13.  
 953 doi:10.1016/j.chemgeo.2019.119343

954 Pineiro, S.A., Stine, O.C., Chauhan, A., Steyert, S.R., Smith, R., Williams, H.N.,  
 955 2007. Global survey of diversity among environmental saltwater  
 956 Bacteriovoraceae. *Environmental Microbiology* 9, 2441–2450.

957 Placella, S.A., Brodie, E.L., Firestone, M.K., 2012. Rainfall-induced carbon dioxide  
 958 pulses result from sequential resuscitation of phylogenetically clustered microbial  
 959 groups. *Proceedings of the National Academy of Sciences of the United States of*  
 960 *America* 109, 10931–10936. doi:10.1073/pnas.1204306109

961 Powell, B., Martens, M., 2005. A review of acid sulfate soil impacts, actions and  
 962 policies that impact on water quality in Great Barrier Reef catchments, including  
 963 a case study on remediation at East Trinity. *Marine Pollution Bulletin* 51, 149–  
 964 164. doi:10.1016/j.marpolbul.2004.10.047

965 Qiu, L., Mao, Y., Gong, A., Zhang, W., Cao, Y., Tong, L., 2016. Inhibition effect of  
 966 *Bdellovibrio bacteriovorus* on the corrosion of X70 pipeline steel induced by

967 sulfate-reducing bacteria. *Anti-Corrosion Methods and Materials* 63, 269–274.  
 968 doi:10.1108/ACMM-10-2014-1447

969 Reid, R.J., Mosley, L.M., 2016. Comparative contributions of solution geochemistry,  
 970 microbial metabolism and aquatic photosynthesis to the development of high pH  
 971 in ephemeral wetlands in South East Australia. *Science of the Total Environment*  
 972 542, 334–343. doi:10.1016/j.scitotenv.2015.10.040

973 Schloss, P.D., Westcott, S.L., 2011. Assessing and Improving Methods Used in  
 974 Operational Taxonomic Unit-Based Approaches for 16S rRNA Gene Sequence  
 975 Analysis. *Applied and Environmental Microbiology* 77, 3219–3226.  
 976 doi:10.1128/AEM.02810-10

977 Schmidt, M., Lipson, H., 2013. Eureka (version 0.98 beta)[software]. Nutonian,  
 978 Somerville, Mass, USA.

979 Schmidt, M., Lipson, H., 2009. Distilling free-form natural laws from experimental  
 980 data. *Science* 324, 81–85.

981 Schoonen, M., 2004. Mechanisms of sedimentary pyrite formation. *Geological*  
 982 *Society of America Special Papers* ... 117–134.

983 Shannon, P., Markiel, A., Ozier, O., Baliga, N.S., Wang, J.T., Ramage, D., Amin, N.,  
 984 Schwikowski, B., Ideker, T., 2003. Cytoscape: a software environment for  
 985 integrated models of biomolecular interaction networks. *Genome Research* 13,  
 986 2498–2504. doi:10.1101/gr.1239303

987 Stöver, B.C., Müller, K.F., 2010. TreeGraph 2: Combining and visualizing evidence  
 988 from different phylogenetic analyses. *BMC Bioinformatics* 11, 7–9.  
 989 doi:10.1186/1471-2105-11-7

990 Sundström, R., Åström, M., 2002. Comparison of the metal content in acid sulfate soil  
 991 runoff and industrial effluents in Finland. *Environmental Science & Technology*  
 992 36, 4269–4272.

993 Team, R.C., 2013. R: A language and environment for statistical computing.

994 Trenberth, K.E., Dai, A., Van Der Schrier, G., Jones, P.D., Barichivich, J., Briffa,  
 995 K.R., Sheffield, J., 2014. Global warming and changes in drought. *Nature Climate*  
 996 Change 4, 17.

997 Tromas, N., Fortin, N., Bedrani, L., Terrat, Y., Cardoso, P., Bird, D., Greer, C.W.,  
 998 Shapiro, B.J., 2017. Characterising and predicting cyanobacterial blooms in an 8-  
 999 year amplicon sequencing time course. *Nature Publishing Group* 11, 1746–1763.  
 1000 doi:10.1038/ismej.2017.58

1001 Venables, W.N., Ripley, B.D., 2002. *Modern Applied Statistics with S*. Springer New  
 1002 York, New York, NY. doi:10.1007/978-0-387-21706-2

1003 Vermaat, J.E., Harmsen, J., Hellmann, F.A., van der Geest, H.G., de Klein, J.J.M.,  
 1004 Kosten, S., Smolders, A.J.P., Verhoeven, J.T.A., Mes, R.G., Ouboter, M., 2016.  
 1005 Annual sulfate budgets for Dutch lowland peat polders: The soil is a major sulfate  
 1006 source through peat and pyrite oxidation. *Journal of Hydrology* 533, 515–522.  
 1007 doi:10.1016/j.jhydrol.2015.12.038

1008 Viollier, E., Inglett, P.W., Hunter, K., Roychoudhury, A.N., Van Cappellen, P., 2000.  
 1009 The ferrozine method revisited: Fe(II)/Fe(III) determination in natural waters.  
 1010 *Applied Geochemistry* 15, 785–790. doi:10.1016/S0883-2927(99)00097-9

1011 Wagner, A., 2005. Energy Constraints on the Evolution of Gene Expression.  
 1012 *Molecular Biology and Evolution* 22, 1365–1374. doi:10.1093/molbev/msi126

1013 Wang, Q., Garrity, G.M., Tiedje, J.M., Cole, J.R., 2007. Naive Bayesian Classifier for  
 1014 Rapid Assignment of rRNA Sequences into the New Bacterial Taxonomy.

1015       Applied and Environmental Microbiology 73, 5261–5267.

1016       doi:10.1128/AEM.00062-07

1017       Warnes, G.R., Bolker, B., Bonebakker, L., Gentleman, R., Huber, W., Liaw, A.,

1018       Lumley, T., Maechler, M., Magnusson, A., Moeller, S., 2009. gplots: Various R

1019       programming tools for plotting data. R Package Version 2.

1020       Watts, M.P., Spurr, L.P., Gan, H.M., Moreau, J.W., 2017. Characterization of an

1021       autotrophic bioreactor microbial consortium degrading thiocyanate 1–13.

1022       doi:10.1007/s00253-017-8313-6

1023       White, I., Melville, M., Macdonald, B., Quirk, R., Hawken, R., Tunks, M., Buckley,

1024       D., Beattie, R., Williams, J., Heath, L., 2007. From conflicts to wise practice

1025       agreement and national strategy: cooperative learning and coastal stewardship in

1026       estuarine floodplain management, Tweed River, eastern Australia. Journal of

1027       Cleaner Production 15, 1545–1558. doi:10.1016/j.jclepro.2006.07.049

1028       Wickham, H., 2011. The split-apply-combine strategy for data analysis 40, 1–29.

1029       doi:10.18637/jss.v040.i01

1030
